# Supplementary material for: Intercomparison of cosmic-ray neutron sensors and water balance monitoring in an urban environment
Source: Copernicus journal article supplement (doi:10.5194/gi-7-83-2018), 2018-03-09
Supplement: Supplementary file 1 [file gi-7-83-2018-supplement.zip]

Archive with 3 entries (3 files):
- gi-7-83-2018-supplement-title-page.pdf
- schroen-intercomparison-suppl_data.zip
- supplement-uranos-materials.pdf
