# Supplementary material for: Intercomparison of cosmic-ray neutron sensors and water balance monitoring in an urban environment
Source: Copernicus journal article supplement (doi:10.5194/gi-7-83-2018), 2018-03-09
Supplement: Supplementary file 1 [file gi-7-83-2018-supplement.zip › gi-7-83-2018-supplement-title-page.pdf]

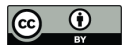

## *Supplement of*

# **Intercomparison of cosmic-ray neutron sensors and water balance monitoring in an urban environment**

**Martin Schrön et al.**

*Correspondence to:* Martin Schrön ([martin.schroen@ufz.de](mailto:martin.schroen@ufz.de))

- [gi-7-83-2018-supplement-title-page.pdf](#)
- [schroen-intercomparison-suppl\\_data.zip](#)
- [supplement-uranos-materials.pdf](#)

The copyright of individual parts of the supplement might differ from the CC BY 3.0 License.
