# Supplementary material for: Intercomparison of cosmic-ray neutron sensors and water balance monitoring in an urban environment
Source: Copernicus journal article supplement (doi:10.5194/gi-7-83-2018), 2018-03-09
Supplement: Supplementary file 1 [file gi-7-83-2018-supplement.zip › supplement-uranos-materials.pdf]

## URANOS simulation materials

List of materials used in URANOS for the simulation of neutron response to the urban test site (Fig. 8):

| Material | Density                  | Description                                                 |
|----------|--------------------------|-------------------------------------------------------------|
| Air      | 1.2 kg/m <sup>3</sup>    | 78 % N <sub>2</sub> , 21 % O <sub>2</sub> , 1 % Ar          |
| Aluminum | 2.66 g/cm <sup>3</sup>   |                                                             |
| Asphalt  | 2.58 g/cm <sup>3</sup>   | 14 % H, 50 % O, 11 % C, 25 % Si                             |
| Building |                          | filled with air, 0.5 m concrete wall                        |
| Concrete | 2.0 g/cm <sup>3</sup>    | 50 % stones, 10 % water                                     |
| Gas pipe |                          | filled with air, 5 mm aluminum wall                         |
| Gras     | < 135 g/m <sup>2</sup>   | variation of plants, 5–15 cm height                         |
| Iron     | 7.87 g/cm <sup>3</sup>   |                                                             |
| Plants   | 2.2 kg/m <sup>3</sup>    | 14 % H, 72 % O, 14 % C, air                                 |
| Sand     |                          | like soil with 5 % moisture                                 |
| Soil     | > 1.43 g/cm <sup>3</sup> | 50 % stones, 0–50 % water                                   |
| Stones   | 1.43 g/cm <sup>3</sup>   | 75 % SiO <sub>2</sub> , 25 % Al <sub>2</sub> O <sub>3</sub> |
| Tar      |                          | like asphalt pavement                                       |
| Tartan   | 0.3 kg/m <sup>3</sup>    | variation of plant material                                 |
| Trees    | < 6 kg/m <sup>2</sup>    | variation of plants, 4–20 m height                          |
| Water    | 1.0 g/cm <sup>3</sup>    | H <sub>2</sub> O                                            |
| Wood     | 0.5 kg/m <sup>3</sup>    | variation of plants                                         |
